# Supplementary material for: A Natural Language Processing Model for COVID-19 Detection Based on Dutch General Practice Electronic Health Records by Using Bidirectional Encoder Representations From Transformers: Development and Validation Study
Source: PubMed Central journal article supplement (PMC10563863; doi:10.2196/49944), 2023-10-04
Supplement: jmir_v25i1e49944_app1.pdf [file jmir_v25i1e49944_app1.pdf]

**Multimedia Appendix 1: Potential Acute COVID-19 Related ICPC-1 Codes**

| <b>ICPC-1 code</b> | <b>Description</b>               | <b>ICPC-1 code</b> | <b>Description</b>                  |
|--------------------|----------------------------------|--------------------|-------------------------------------|
| A01                | Pain general                     | R02                | Shortness of breath/dyspnoea        |
| A02                | chills                           | R03                | Wheezing                            |
| A03                | fever                            | R04                | Breathing problem other             |
| A04                | Weakness/tiredness general       | R05                | Cough                               |
| A29                | General symptom/complaint, other | R07                | Sneezing/nasal congestion           |
| A77                | Viral disease, other/NOS         | R08                | Nose symptom/complaint other        |
| A78                | Infectious disease, other/NOS    | R09                | Sinus symptom/complaint             |
| B02                | Lymph gland(s) enlarged/painful  | R21                | Throat symptom/complaint            |
| B03                | Complaints lymph gland(s)        | R22                | Tonsil complaints                   |
| D01                | Abdominal pain/cramps general    | R23                | Voice symptom/complaint             |
| D09                | Nausea                           | R28                | Limited function/disability (R)     |
| D10                | Vomiting                         | R29                | Respiratory symptom/complaint other |
| D11                | Diarrhoea                        | R74                | Upper respiratory infection acute   |
| D18                | Change in faeces/bowel movements | R75                | Sinusitis acute/chronic             |
| F02                | Red eye                          | R76                | Tonsillitis acute                   |
| F70                | Conjunctivitis infectious        | R77                | Laryngitis/tracheitis acute         |
| H03                | Tinnitus, ringing/buzzing ear    | R78                | Acute bronchitis/bronchiolitis      |
| L18                | Muscle pain                      | R80                | Influenza                           |
| N01                | Headache                         | R81                | Pneumonia                           |
| N16                | Disturbance of smell/taste       | R83                | Respiratory infection other         |
| R01                | Pain respiratory system          |                    |                                     |
