# Supplementary material for: A Natural Language Processing Model for COVID-19 Detection Based on Dutch General Practice Electronic Health Records by Using Bidirectional Encoder Representations From Transformers: Development and Validation Study
Source: PubMed Central journal article supplement (PMC10563863; doi:10.2196/49944), 2023-10-04
Supplement: jmir_v25i1e49944_app3.pdf [file jmir_v25i1e49944_app3.pdf]

**Multimedia Appendix 3: Characteristics of Included Population From the Three Academic GP Networks**

|                    | <b>UMCG</b>   | <b>RUMC</b>  | <b>MUMC</b>  |
|--------------------|---------------|--------------|--------------|
|                    | <b>N (%)</b>  | <b>N (%)</b> | <b>N (%)</b> |
| <b>Population</b>  | 184 700 (100) | 31 351 (100) | 87 499 (100) |
| <b>Gender</b>      |               |              |              |
| <b>MALE</b>        | 78 658 (43)   | 13 127 (42)  | 36 715 (42)  |
| <b>FEMALE</b>      | 106 042 (57)  | 18 224 (58)  | 50 784 (58)  |
| <b>Age (years)</b> |               |              |              |
| <b>0-17</b>        | 35 847 (19)   | 8 574 (27)   | 15 661 (18)  |
| <b>18-40</b>       | 44 495 (24)   | 9 143 (29)   | 20 503 (23)  |
| <b>40-64</b>       | 60 073 (33)   | 9 578 (31)   | 29 789 (34)  |
| <b>&gt;65</b>      | 44 285 (24)   | 4 056 (13)   | 21 546 (25)  |

Abbreviations: GP, general practitioner; MUMC, Maastricht University Medical Center;

RUMC, Radboud University Medical Center Nijmegen; UMCG, University Medical Center

Groningen
